# Supplementary material for: Evaluation of the Effect of Plectranthus amboinicus L. Leaf Extracts on the Bacterial Antioxidant System and Cell Membrane Integrity of Pseudomonas aeruginosa PA01 and Staphylococcus aureus NCTC8325
Source: MDPI journal article supplement (doi:10.3390/pathogens12060853), 2023-06-20
Supplement: s1 [file s1]

## 1. Lipid peroxidation

**Table S1.1: Effect of Indian borage extracts on lipid peroxidation in *P. aeruginosa***

| Samples   | Absorbance at 535nm | Abs-blank | Concentration of malondialdehyde [mM] | Concentration of malondialdehyde [μM] | Concentration of malondialdehyde [nM] | % Change in lipid peroxidation | S. D    |
|-----------|---------------------|-----------|---------------------------------------|---------------------------------------|---------------------------------------|--------------------------------|---------|
| Untreated | 0.125               | 0.089     | 0.000571                              | 0.571                                 | 571                                   | -                              | 0.00057 |
| 1% DMSO   | 0.122               | 0.086     | 0.0005606                             | 0.56                                  | 560                                   | Decrease by 2%                 | 0.0006  |
| Cipro     | 0.135               | 0.135     | 0.000864                              | 0.864                                 | 864                                   | Increase by 51.31%             | 0.00057 |
| IB        | 0.127               | 0.127     | 0.000813                              | 0.813                                 | 813                                   | Increase by 42.38%             | 0.00023 |
| Blank     | 0.036               | -         |                                       |                                       |                                       |                                |         |

**Table S1.2 Anova table for the effect of Indian borage extracts on lipid peroxidation in *P. aeruginosa***

| Comparison                 | Mean Difference | q       | P value     |
|----------------------------|-----------------|---------|-------------|
| Untreated vs 1%DMSO        | 11.00           | 36666   | *** P<0.001 |
| Untreated vs Ciprofloxacin | -293.00         | 976641  | *** P<0.001 |
| Untreated vs IB            | -242.00         | 806645  | *** P<0.001 |
| 1%DMSO vs Cipro            | -304.00         | 1013307 | *** P<0.001 |
| 1%DMSO vs IB               | -253.00         | 843311  | *** P<0.001 |
| Cipro vs IB                | 51.00           | 169996  | *** P<0.001 |

**Table S1.3 The effect of Indian borage extracts on lipid peroxidation in *S. aureus***

| Samples   | Absorbance at 535nm | Abs-blank | Concentration of malondialdehyde [mM] | Concentration of malondialdehyde [μM] | Concentration of malondialdehyde [nM] | % Change in lipid peroxidation | S. D   |
|-----------|---------------------|-----------|---------------------------------------|---------------------------------------|---------------------------------------|--------------------------------|--------|
| Untreated | 0.076               | 0.04      | 0.0002562                             | 0.2562                                | 256.2                                 | -                              | 0      |
| 1% DMSO   | 0.072               | 0.036     | 0.0002306                             | 0.2306                                | 230.6                                 | Decrease by 10%                | 0.0065 |
| Cipro     | 0.099               | 0.063     | 0.0004035                             | 0.4035                                | 403.5                                 | Increase by 57%                | 0.0015 |
| IB        | 0.093               | 0.057     | 0.0003651                             | 0.3651                                | 365.1                                 | Increase by 42.5%              | 0.0005 |
| Blank     | 0.036               | -         |                                       |                                       |                                       |                                |        |

**Table S1.4 Anova table for the effect of Indian borage extracts on lipid peroxidation in *S. aureus***

| Comparison                 | Mean Difference | q     | P value     |
|----------------------------|-----------------|-------|-------------|
| Untreated vs 1%DMSO        | 25.600          | 13257 | *** P<0.001 |
| Untreated vs Ciprofloxacin | -147.30         | 76278 | *** P<0.001 |
| Untreated vs IB            | -108.90         | 56393 | *** P<0.001 |
| 1%DMSO vs Cipro            | -172.90         | 89534 | *** P<0.001 |
| 1%DMSO vs IB               | -134.50         | 69649 | *** P<0.001 |
| Cipro vs IB                | 38.400          | 19885 | *** P<0.001 |

**2. Reactive oxygen species****Table S2.1: Effect of IB extracts on reactive oxygen species in *P. aeruginosa*.**

| Samples<br>(AU·CFU mL <sup>-1</sup> ) | Untreated | 1%DMSO | Cipro    | IB      |
|---------------------------------------|-----------|--------|----------|---------|
| Average                               | 28975     | 32225  | 204943.6 | 45060.6 |
| S. D                                  | 414.07    | 1035.1 | 14298    | 4222.4  |

**Table S2.2 Anova table of the effect of IB extracts on ROS in *P. aeruginosa*.**

| Comparison                 | Mean Difference | q      | P value     |
|----------------------------|-----------------|--------|-------------|
| Untreated vs 1%DMSO        | -3250           | 0.7531 | ns P>0.05   |
| Untreated vs Ciprofloxacin | -175969         | 40.774 | *** P<0.001 |
| Untreated vs IB            | -160869         | 44.727 | *** P<0.001 |
| 1%DMSO vs Cipro            | -172719         | 40.021 | *** P<0.001 |
| 1%DMSO vs IB               | -12836          | 2.974  | ns P>0.05   |
| Cipro vs IB                | 1598883         | 37.047 | *** P<0.001 |

**Table S2.3: Effect of IB extracts on reactive oxygen species in *S. aureus*.**

| <b>Samples (AU CFU mL<sup>-1</sup>)</b> | <b>Untreated</b> | <b>1%DMSO</b> | <b>Cipro</b> | <b>IB</b> |
|-----------------------------------------|------------------|---------------|--------------|-----------|
| <b>Average</b>                          | 27375.33         | 34006.3       | 186044.3     | 151678.6  |
| <b>S.D.</b>                             | 4830.1           | 86.8          | 5848.4       | 1155.5    |

**Table S2.4 Anova table of the effect of IB extracts on ROS in *S. aureus*.**

| <b>Comparison</b>          | <b>Mean Difference</b> | <b>q</b> | <b>P value</b> |
|----------------------------|------------------------|----------|----------------|
| Untreated vs 1%DMSO        | -6631                  | 2.994    | ns P>0.05      |
| Untreated vs Ciprofloxacin | -158669                | 71.633   | *** P<0.001    |
| Untreated vs IB            | -124303                | 56.118   | *** P<0.001    |
| 1%DMSO vs Cipro            | -152038                | 68.639   | *** P<0.001    |
| 1%DMSO vs IB               | -117672                | 533.124  | ns P>0.05      |
| Cipro vs IB                | 34366                  | 15.515   | *** P<0.001    |

### **3. Evaluation of cell membrane integrity as a potential antimicrobial target**

#### **a. Cytoplasmic membrane permeability assay**

**Table S3.1: Effect of IB extracts on cytoplasmic membrane permeability in *P. aeruginosa*.**

|             | Absorbance (nm) |       |       |       |       |       |       | % dye released |
|-------------|-----------------|-------|-------|-------|-------|-------|-------|----------------|
| SAMPLES     | 0               | 10    | 20    | 30    | 40    | 50    | 60    |                |
| Untreated   | 0.035           | 0.035 | 0.045 | 0.055 | 0.068 | 0.095 | 0.095 | -              |
| 1% DMSO     | 0.043           | 0.044 | 0.115 | 0.115 | 0.118 | 0.119 | 0.138 | 45%            |
| Cipro       | 0.044           | 0.044 | 0.109 | 0.121 | 0.134 | 0.141 | 0.162 | 71%            |
| 20% acetone | 0.038           | 0.039 | 0.044 | 0.05  | 0.067 | 0.078 | 0.099 | 4.2%           |
| IB          | 0.043           | 0.044 | 0.115 | 0.115 | 0.132 | 0.149 | 0.15  | 58%            |

**Table S3.2: Effect of IB extracts on cytoplasmic membrane permeability in *S. aureus*.**

|             | Absorbance (nm) |       |       |       |       |       |       | % dye released |
|-------------|-----------------|-------|-------|-------|-------|-------|-------|----------------|
| SAMPLES     | 0               | 10    | 20    | 30    | 40    | 50    | 60    |                |
| Untreated   | 0.032           | 0.039 | 0.039 | 0.045 | 0.070 | 0.089 | 0.099 | -              |
| 1% DMSO     | 0.043           | 0.044 | 0.046 | 0.055 | 0.103 | 0.114 | 0.158 | 59%            |
| Cipro       | 0.031           | 0.036 | 0.089 | 0.125 | 0.138 | 0.147 | 0.178 | 78%            |
| 20% Acetone | 0.036           | 0.037 | 0.040 | 0.042 | 0.055 | 0.068 | 0.086 | -              |
| IB          | 0.040           | 0.040 | 0.094 | 0.114 | 0.179 | 0.179 | 0.181 | 83%            |

#### **b. Rhodamine-6-G uptake assay**

**Table S4.1: Effect of IB extracts on efflux pumps in *P. aeruginosa* and *S. aureus* using R-6-G uptake assay.**

| Samples   | Absorbance at 527nm (% inhibition) |                  |
|-----------|------------------------------------|------------------|
|           | <i>P. aeruginosa</i>               | <i>S. aureus</i> |
| Untreated | 0.2                                | 0.63             |
| Reserpine | 0.095 (52.5%)                      | 0.141 (77%)      |
| 1%DMSO    | 0.271                              | 0.65             |
| Cipro     | 0.129 (35.5%)                      | 0.328 (48%)      |
| IB        | 0.149 (25.5%)                      | 0.477 (24.2%)    |

**Table S4.2: Anova table of the effect of IB extracts on efflux pumps in *P. aeruginosa* using R-6-G uptake assay.**

| Comparison             | Mean Difference | q      | P value     |
|------------------------|-----------------|--------|-------------|
| Untreated vs reserpine | 0.1045          | 16.154 | *** P<0.001 |
| Untreated vs 1% DMSO   | -0.7125         | 11.014 | ns P>0.05   |
| Untreated vs Cipro     | 0.07050         | 10.898 | *** P<0.001 |
| Untreated vs IB        | 0.05800         | 8.966  | *** P<0.001 |
| Reserpine vs 1%DMSO    | -0.1758         | 27.169 | *** P<0.001 |
| Reserpine vs Cipro     | -0.03400        | 5.256  | * P<0.05    |
| Reserpine vs IB        | -0.04650        | 7.188  | **P<0.001   |
| 1%DMSO vs Cipro        | 0.1418          | 21.913 | *** P<0.001 |
| 1%DMSO vs IB           | 0.1293          | 19.980 | *** P<0.001 |
| Cipro vs IB            | -0.01250        | 1.932  | ns P>0.05   |

**Table S4.3: Anova table of the effect of IB extracts on efflux pumps in *S. aureus* using R-6-G uptake assay.**

| Comparison             | Mean Difference | q      | P value     |
|------------------------|-----------------|--------|-------------|
| Untreated vs reserpine | 0.4890          | 16.033 | *** P<0.001 |
| Untreated vs 1% DMSO   | -0.01950        | 0.6384 | ns P>0.05   |
| Untreated vs Cipro     | 0.3025          | 9.918  | *** P<0.001 |
| Untreated vs IB        | 0.1533          | 5.025  | * P<0.05    |
| Reserpine vs 1%DMSO    | -0.5085         | 16.673 | *** P<0.001 |
| Reserpine vs Cipro     | -0.1865         | 6.115  | ** P<0.01   |
| Reserpine vs IB        | -0.3358         | 11.009 | ***P<0.001  |
| 1%DMSO vs Cipro        | 0.3220          | 10.558 | *** P<0.001 |
| 1%DMSO vs IB           | 0.1728          | 5.664  | ** P<0.01   |
| Cipro vs IB            | -0.1493         | 4.894  | * P<0.05    |
